## Happens in the best of subfamilies: Establishment and

2 **repeated replacements of co-obligate secondary endosymbionts within**

### Lachninae aphids

4 **Short title:** Co-obligate Endosymbiont Dynamics in the Lachninae

6 Alejandro Manzano-Marín<sup>1</sup>, Gitta Szabo<sup>2</sup>, Jean-Christophe Simon<sup>3</sup>, Matthias Horn<sup>2</sup> and Amparo  
Latorre<sup>1,4,\*</sup>

8

<sup>1</sup>Institut Cavanilles de Biodiversitat i Biologia Evolutiva, Universitat de València, Paterna,  
10 Comunitat Valenciana, Spain

<sup>2</sup>Department of Microbiology and Ecosystem Science, University of Vienna, Vienna, Austria

12 <sup>3</sup>UMR1349 Institut de Génétique, Environnement et Protection des Plantes (IGEPP), Institut  
National de la Recherche Agronomique (INRA), Le Rheu, Bretagne, France

14 <sup>4</sup>Área de Genómica y Salud de la Fundación para el fomento de la Investigación Sanitaria y  
Biomédica de la Comunitat Valenciana (FISABIO)-Salud Pública, València, Comunitat Valenciana,  
16 Spain

For correspondence: [amparo.latorre@uv.es](mailto:amparo.latorre@uv.es); Tel. +34 96 354 3649; Fax +34 96 354 3670

18

**Keywords:** *Serratia symbiotica*; Lachninae; *Candidatus* Fukatsua symbiotica; aphid  
20 endosymbiont; symbiont replacement

## 2 **Summary**

Virtually all aphids maintain an obligate mutualistic symbiosis with bacteria from the  
4 *Buchnera* genus, which produce essential nutrients for their aphid hosts. Most aphids from the  
Lachninae subfamily have been consistently found to house additional endosymbionts, mainly  
6 *Serratia symbiotica*. This apparent dependence on secondary endosymbionts was proposed to have  
been triggered by the loss of the riboflavin biosynthetic capability by *Buchnera* in the Lachninae  
8 last common ancestor. However, an integral large-scale analysis of secondary endosymbionts in the  
Lachninae is still missing, hampering the interpretation of the evolutionary and genomic analyses of  
10 these endosymbionts. Here, we analysed the endosymbionts of selected representatives from seven  
different Lachninae genera and nineteen species, spanning four tribes, both by FISH (exploring the  
12 symbionts' morphology and tissue tropism) and 16S rRNA gene sequencing. We demonstrate that  
all analysed aphids possess dual symbiotic systems, and while most harbour *S. symbiotica*, some  
14 have undergone symbiont replacement by other phylogenetically-distinct bacterial taxa. We found  
that these secondary associates display contrasting cell shapes and tissue tropism, and some appear  
16 to be lineage-specific. We propose a scenario for symbiont establishment in the Lachninae, followed  
by changes in the symbiont's tissue tropism and symbiont replacement events, thereby highlighting  
18 the extraordinary versatility of host-symbiont interactions.

## 20 **Originality-Significance Statement**

A key question in evolutionary biology is that of how mutualism evolves. One way to  
22 approach this problem is to investigate recently-established mutualistic associations, particularly by  
comparing various symbiotic systems in closely related hosts. Here, we present a most  
24 comprehensive study to investigate co-obligate symbioses in aphids, focusing in the Lachninae  
subfamily. While most aphids keep an obligate vertically-transmitted association with intracellular

*Buchnera* bacteria, some, such as members of the Lachninae subfamily, host an additional putative  
2 co-obligate symbiont. Thus, the Lachninae dual symbiotic systems offer a unique opportunity to  
understand the evolutionary dynamics of host-symbiont associations, in particularly how secondary  
4 symbionts become obligate and eventually may be replaced. Through genome sequencing of three  
aphid species belonging to distantly related tribes within the subfamily, we have previously  
6 corroborated that they have indeed established co-obligate mutualistic associations with the *S.*  
*symbiotica* secondary endosymbiotic bacterium. This was putatively facilitated by an ancient  
8 pseudogenisation of the riboflavin biosynthetic pathway in *Buchnera*, rendering it unable to provide  
the essential vitamin to the host. However, not all Lachninae members harbour *S. symbiotica*, some  
10 species being associated to at least four different bacterial taxa. To correctly interpret the genomic  
data and to understand the evolutionary dynamics of these symbiotic associations, a wide-range  
12 analysis of both the phylogenetic relations as well as of the secondary symbionts' localisation within  
the bacteriome is needed. To tackle this, we have combined phylogenetic analyses of the symbionts'  
14 16S rRNA gene sequences and FISH microscopy, to understand the symbiont's identity as well as  
the morphological characteristics and tissue tropism. The phylogenetic affinities and patterns of co-  
16 divergence of the symbionts, in combination with previously published genomic data, have enabled  
us to build an evolutionary scenario for the establishment, changes in tissue tropism such as “stable”  
18 internalisation into bacteriocytes, and replacements of the putative “ancient” secondary  
endosymbiont from the Lachninae last common ancestor. Also, we were able to determine through  
20 phylogenetic analyses that some putative co-obligate endosymbionts may have evolved from once  
facultative ones. The evolutionary framework presented here reveals a dynamic pattern for the more  
22 recent evolutionary history of these symbioses, including replacement and novel acquisition of  
phylogenetically different co-obligate symbionts. This study opens new research avenues on this  
24 symbiont-diverse subfamily, providing insight into how mutualism in endosymbiotic associations  
can evolve, and the role these bacteria have played in the species' adaptation and even in the

speciation process.

## 2 Introduction

The increasing recognition that symbionts play an important role in the ecology and evolution of their hosts, as well as the rapid changes in the type and nature of these symbiotic associations, call for an evolutionary framework to understand these dynamics. Symbiotic relationships between aphids and their primary obligate bacterial endosymbiont *Buchnera aphidicola*, represent one of the most well studied cases of bacterial endosymbiosis within animals. The *Buchnera* symbiosis is found across all modern aphids (Aphididae Latreille, 1802 family) (Buchner, 1953), with the notable exception of members belonging to the monophyletic Cerataphidini tribe Baker, 1920, in which *Buchnera* has been replaced by an extracellular yeast-like symbiont (Buchner, 1953; Fukatsu and Ishikawa, 1992; Fukatsu *et al.*, 1994). *Buchnera* cells have a round and pleomorphic shape (Michalik *et al.*, 2014), and inhabit the cytoplasm of bacteriocytes (specialised cells evolved to house the endosymbiont), which make up a distinct organ-like structure called the bacteriome (Buchner, 1953; Fukatsu *et al.*, 1998). The onset of the aphid-*Buchnera* symbiosis dates back to at least 80-150 million years ago (hereafter **Mya**) (von Dohlen and Moran, 2000). *Buchnera*, as other “ancient” obligate endosymbionts, underwent a rapid genome erosion early in its evolutionary history with aphids, resulting in a high degree of synteny among distantly related *Buchnera* (Tamas *et al.*, 2002; van Ham *et al.*, 2003), and since then, lineages of both partners have been co-diverging. This has been evidenced through phylogenetic reconstructions using *Buchnera* DNA or amino acid sequences, which parallel their aphid hosts' evolutionary relationships (Munson *et al.*, 1991; Jouselin *et al.*, 2009; Liu *et al.*, 2013). Besides *Buchnera*, aphids can also harbour secondary endosymbionts (in addition to the primary symbiont), these being of facultative or obligate nature in some lineages. Contrary to obligate symbionts, facultative ones are not required for the correct development, reproduction and survival of their host. Still, they can provide a benefit under certain environmental or ecological conditions (conditional mutualism)

(reviewed in Oliver *et al.*, 2010, 2014). To date, various secondary facultative bacterial endosymbionts have been identified, primarily in the pea aphid *Acyrtosiphon pisum* (Aphidinae subfamily) (Fukatsu *et al.*, 2000, 2001; Sakurai *et al.*, 2005; Degnan, Leonardo, *et al.*, 2009; Degnan, Yu, *et al.*, 2009; Guay *et al.*, 2009; Tsuchida *et al.*, 2014). These secondary symbionts have a very different tissue tropism than *Buchnera*, as they can be present in separate bacteriocytes (called secondary bacteriocytes), co-infecting the primary endosymbiont's bacteriocytes, located in sheath cells (at the periphery of the bacteriome and found closely associated to bacteriocytes), and/or free in the haemocoel (Fukatsu *et al.*, 2000; Sandström *et al.*, 2001; Moran *et al.*, 2005; Sakurai *et al.*, 2005; Michalik *et al.*, 2014). While many secondary symbionts are facultative for their hosts, some seem to have established co-obligate associations with their respective symbiotic partners. In this respect, the subfamily Lachninae Herrich-Schaeffer, 1854 of aphids is peculiar, in that all members analysed thus far by microscopy techniques have been found to house secondary endosymbionts (Buchner, 1953; Fukatsu and Ishikawa, 1998; Fukatsu *et al.*, 1998; Lamelas *et al.*, 2008; Pyka-Fościak and Szklarzewicz, 2008; Michalik *et al.*, 2014).

The Lachninae can be divided into 5 monophyletic tribes: i) **Lachnini** Herrich-Schaeffer, 1854, ii) **Stomaphidini** Mordvilko, 1914, iii) **Tramini** Herrich-Schaeffer, 1854, iv) **Tuberolachnini** Mordvilko, 1942, and v) **Eulachnini** Baker, 1920 (Chen, Favret, *et al.*, 2015) (**Fig 1**). The first four tribes comprise 112 known species organised into 13 genera, however, due to the lack of molecular data, the phylogenetic affiliation of three of these (*Neonippolachnus*, *Sinolachnus*, and *Eotrama*) remains unresolved, and thus are not included in the Figure. While the Lachnini, Tramini, and Tuberolachnini feed on angiosperms, the *Stomaphidini* feed on both angiosperm and gymnosperm trees (bark-trunk and root). The latter have evolved some of the longest mouthparts among aphids, particularly the trunk-feeding species (Blackman and Eastop, 1994). The Tramini are unique in that they solely feed on the roots of herbaceous plants, mostly composites (Blackman and Eastop, 2006). Finally, the Eulachnini, which exclusively feed on conifers, are classified into 4 genera: *Essigella*,

1 *Eulachnus*, *Pseudessigella* (with no molecular data available), and *Cinara*. The latter is the largest  
2 genus within the Lachninae and has been traditionally taxonomically classified into three subgenera  
(*Cinara*, *Cupressobium*, and *Cedrobium*). However, recent extensive molecular work on members  
4 of the subgenus *Cinara* has found the subgenus *Cinara* (*Cinara*) polyphyletic, and thus has divided  
the genus into three major phylogenetic clades, termed simply **A**, **B**, and **C** (Meseguer *et al.*, 2015).

6

**Fig 1. Dendrogram depicting the relationships among Lachninae aphids.** Dendrogram based on  
8 (Chen, Favret, *et al.*, 2015) and (Meseguer *et al.*, 2015). Coloured boxes shading, as well as vertical  
lines on the right-hand side, delimit the tribal clades. Names next to the coloured vertical lines  
10 provide tribal names and number of extant species (in brackets), according to (Favret, 2016). For  
*Cinara* clades, a grey vertical bar is followed by the different subgenera that make up the clades A,  
12 B, and C. The genera *Eotrama* (Tramini), *Neonippolachnus* (Tuberolachnini), *Synolachnus*  
(Tuberolachnini), and *Pseudessigella* (Eulachnini) are not included, as no molecular data for their  
14 reliable placement is currently available. Based on (Chen, Favret, *et al.*, 2015), in the current work  
we have considered the *Schizolachnus* genus as a subgenus within the *Cinara* clade B.

16

Known secondary symbionts of Lachninae differ in tissue tropism and cell shape (Buchner,  
18 1953; Fukatsu and Ishikawa, 1998; Fukatsu *et al.*, 1998; Pyka-Fościak and Szklarzewicz, 2008;  
Michalik *et al.*, 2014), as well as in phylogenetic origin (Russell *et al.*, 2003; Lamelas *et al.*, 2008;  
20 Burke *et al.*, 2009; Jousset *et al.*, 2016). Although different bacterial taxa have been found  
associated to Lachninae aphids, many species of this subfamily have been systematically found  
22 associated with members of the bacterial genus *Serratia*, mainly *Serratia symbiotica* (Fukatsu *et al.*,  
1998; Russell *et al.* 2003; Lamelas *et al.*, 2008; Burke *et al.*, 2009; Chen *et al.* 2015; Jousset *et*  
24 *al.*, 2016) (for a summary see **Table S1**). Particularly, most *Cinara* species have been consistently

found to house *S. symbiotica* strains, which form two phylogenetically distinct clusters (based on  
2 16S rRNA gene sequences), one “facultative-like” and one “obligate-like” (hereafter **FL** and **OL**,  
respectively) (Lamelas *et al.*, 2008; Burke *et al.*, 2009). Whole genome sequencing and metabolic  
4 reconstruction of the *Buchnera-S. symbiotica* bacterial consortia of three Lachninae species  
revealed that *S. symbiotica* strains, belonging to FL and OL, had indeed established co-obligate  
6 associations along with *Buchnera* in these hosts (Gosalbes *et al.*, 2008; Lamelas, Gosalbes,  
Manzano-Marín, *et al.*, 2011; Manzano-Marín and Latorre, 2014; Manzano-Marín *et al.*, 2016).  
8 Through comparative genomics of these di- (*Buchnera-S. symbiotica*) vs. mono-endosymbiotic  
(*Buchnera*-only) systems, it was postulated that the establishment of *S. symbiotica* as a co-obligate  
10 endosymbiont in the Lachninae last common ancestor (hereafter **LLCA**) was facilitated by a  
putative ancient pseudogenisation of the riboflavin biosynthetic pathway in *Buchnera* and the  
12 complementation of this loss-of-function by *S. symbiotica* (Manzano-Marín and Latorre, 2014;  
Manzano-Marín *et al.*, 2016). Substantial differences regarding cell morphology and genomic  
14 characteristics observed among extant *S. symbiotica* strains suggest that these represent different  
stages of the genome reduction process towards a highly reduced obligate intracellular symbiont.

16       Given the overwhelming evidence pointing towards a dependency on secondary  
endosymbionts within the Lachninae, we sought to further understand the evolutionary succession  
18 of establishments, replacements, and changes in tissue tropism (e.g. “stable” internalisations into  
distinct bacteriocytes), of secondary endosymbionts among species of this subfamily. For this  
20 purpose, we have identified the secondary endosymbionts of distantly related Lachninae aphids  
belonging to 19 different species (8 different genera collected in three different countries) (**Table**  
22 **S1**) through 16S rRNA gene sequencing and phylogenetic analysis. In selected species, we have  
determined the location of the secondary endosymbionts using fluorescence *in situ* hybridisation  
24 (**FISH**) with 16S rRNA targeted specific oligonucleotide probes. We propose an evolutionary  
scenario for the establishment of an original secondary co-obligate endosymbiont in the LLCA,

followed by symbiont replacements, “stable” internalisations of these into distinct bacteriocytes, and/or the putative establishment of tertiary obligate symbionts in different aphid lineages from this symbiont-diverse subfamily.

## 4 Results

### *S. symbiotica* and *S. marcescens*-like secondary symbionts

6 Most *Cinara* spp. investigated so far have been found to be associated with different *S. symbiotica* strains (Lamelas *et al.*, 2008; Burke *et al.*, 2009; Jousselin *et al.*, 2016). Here, we have  
8 collected 19 representatives (comprising 11 species) of *Cinara* clades A (n=5), B (n=7), and C (n=7), and have identified their endosymbionts through PCR, cloning, and sequencing of their 16S  
10 rRNA genes. We found that the secondary symbionts of all of the collected species – except for *Cinara (Cinara) confinis* (*Cinara* clade C) and *Cinara (Schizolachnus) obscurus* – were indeed  
12 affiliated with *S. symbiotica* (**Table S1**).

To test for co-speciation previously observed for *Buchnera-Serratia* symbiont pairs within  
14 the Lachninae in the light of our new data, we performed a Bayesian phylogenetic reconstruction using currently available 16S rRNA gene sequences of both *Buchnera* (**Fig 2A**) and *Serratia* (**Fig**  
16 **2B**) from Lachninae aphids. Contrary to earlier studies (Lamelas *et al.*, 2008; Burke *et al.*, 2009), we failed to recover the previously described FL and OL *S. symbiotica* clusters. We found that all  
18 Lachninae *S. symbiotica* strains, but the one from *Trama caudata*, form a well-supported and unresolved monophyletic clade nested within a group composed mainly of facultative strains of *S.*  
20 *symbiotica* from Aphidinae aphids, a strain from *Adelges tsugae* (Hemiptera: Adelgidae), and one from the Lachninae aphid *Trama troglodytes* (**Fig 2B**). This unresolved clade contains the “early”  
22 co-obligate *S. symbiotica* strain from *Cinara (Cupressobium) tujafilina* (Manzano-Marín and Latorre, 2014) and a strain from the closely related *Cinara (Cupressobium) cupressi*. Within the  
24 Lachninae *S. symbiotica* clade, we recovered three well-supported monophyletic clades made up from: (i) *Cinara (Cinara) ponderosae* and *Cinara (Cinara) terminalis* (both from *Cinara* cluster A),



(ii) some *Stomaphis* spp., and (iii) most *Lachnus* species. The latter belong to various closely related species, some suspected to be synonyms of *Lachnus tropicalis* (Blackman and Eastop, 1994), which would be consistent with the high sequence identity (>99%) of their *S. symbiotica* endosymbionts' 16S rRNA gene. Interestingly, most *S. symbiotica* strains from *Cinara* clade A form a well-supported monophyletic clade, and within this, there is high congruency with the phylogenetic relationships of the *Buchnera* strains found in the respective hosts, particularly within two subclades (**Fig 2A and B**, vertical black lines). In contrast, most *S. symbiotica* strains from *Cinara* clade B are polyphyletic, and their phylogenetic relationships do not seem to mirror those of the respective *Buchnera* symbiont. Curiously, both the *Buchnera* and *S. symbiotica* from *Cinara* (*Cupressobium*) *costata* are recovered nested within strains from *Cinara* clade A. This contrasts with previously established *Cinara* phylogenetic relationships (Chen, Favret, *et al.*, 2015; Meseguer *et al.*, 2015), which show this species to be part of a basal group of *Cinara* clade C. On the other hand, *S. symbiotica* strains from *Lachnus roboris*, *Lachnus quercihabitans*, *Tuberolachnus salignus*, and *Pterochloroides persicae* are all recovered within a clade encompassing most *S. symbiotica* strains from *Cinara* spp., reflecting no congruency with neither their hosts' nor their corresponding *Buchnera* relationships.

*Serratia* strains from *Stomaphis* spp. are recovered nested within both the free-living *S. marcescens* strains and the Lachninae *S. symbiotica* clade. The former constitutes what we denominate the *S. marcescens*-like secondary symbionts (hereafter **SMLSS**), all of which have been identified from aphids belonging to a single clade of *Stomaphis* spp. (**Fig 2A and B**). The latter are recovered as a monophyletic clade which is congruent with the *Buchnera* phylogeny, and as basal to the clade comprising most *S. symbiotica* strains from *Cinara* species.

**Fig 2. 16S rRNA-based phylogenetic relationships of *Buchnera* and *Serratia* strains from Lachninae aphids.** Bayesian phylogram of (A) *Buchnera* and (B) *Serratia* symbionts from selected

aphids. *Buchnera* from the Fordini tribe and free-living *Serratia* strains were used for rooting the  
2 respective trees. Values at nodes indicate the posterior probability. An “\*” at the node indicate a  
posterior probability of 1. For the *Buchnera* tree, the thicker branches represent constrained  
4 relationships within Lachninae tribes according to (Chen, Favret, *et al.*, 2015). Following the  
species name, strain/isolate names and corresponding *Cinara* clade are indicated in grey, without  
6 and with parenthesis, respectively. Aphid tribe names in **A** are indicated at the top-right of the  
coloured boxes. The coloured box in **B** delimits the *S. symbiotica* clade, while dotted boxes delimit  
8 the SMLSS (from *Stomaphis* spp.) and the *S. symbiotica* strains from Lachninae aphids,  
respectively. In both **A** and **B**, bold-lettered species names indicate the selected species we have  
10 used for FISH microscopy.

12       Next, we investigated the diversity in tissue tropism and intracellular location of *S.*  
*symbiotica* within distantly related Lachninae by whole-mount FISH using aphid embryos. We  
14 found that all of the FISH-analysed specimens for *S. symbiotica* indeed housed this symbiont,  
meaning they were fixed in the population and suggesting that they represent obligate symbionts.  
16 Interestingly, we observed a great diversity in both cell-shape and tissue tropism of *S. symbiotica*  
among the selected Lachninae (**Figs 3 and S1**). In *C. (Cu.) tujafilina* and *C. (Cu.) cupressi*, *S.*  
18 *symbiotica* is present in the periphery of the *Buchnera* bacteriocytes, co-infecting them, and also  
occupying its own bacteriocytes (**Figs 3A-B and S1A-D**). On the other hand, in *Cinara (Cinara)*  
20 *cedri* (clade B); *Tu. salignus*; *Pt. Persicae*; and *Tr. caudata*, *S. symbiotica* is housed exclusively  
inside distinct bacteriocytes (**Figs 3C, D, E, F, and S1E-L**), and thus “stably” internalised in its  
22 own distinct host cells. The distribution of these secondary bacteriocytes is different between the  
aphid species. In *C. (Ci.) cedri* they are interspersed among *Buchnera* bacteriocytes (**Figs 3C, and**  
24 **S1E-G**), in *Tu. salignus* they are found forming a “bacteriome core” surrounded by primary  
bacteriocytes (**Figs 3D and S1H-I**), and in *Pt. persicae* they form a “layer” along the bacteriome

(Figs 3E and S1J). *S. symbiotica* cells appear round-shaped in *C. (Ci.) cedri*, *Tu. salignus*, and *Pt. Persicae*, while in *Tr. caudata* the secondary symbiont retains a rod shape and cell size similar to free-living *Serratia* strains (Figs 3F and S1K-L). Moreover, the *S. symbiotica* strains of *C. (Cu.) tujafilina* (Figs 3A and S1A-C) and *C. (Cu.) cupressi* (Figs 3B and S1D) show an elongated filamentous cell shape, similarly to the facultative *S. symbiotica* symbiont of *Ac. pisum* (Moran *et al.*, 2005).

**8 Fig 3. Location and morphology of *S. symbiotica* in selected Lachninae aphids.** FISH  
microscopic images of aphid embryos from selected Lachninae aphids. Symbiont-specific probes  
10 were used for FISH, except for panels **A** and **B** in which *Buchnera* was visualised by a general  
bacterial probe (blue) and *Serratia* by overlapping signals with a *Serratia*-specific probe (red). **(A)**  
12 Ventral view of a *C. (Cu.) tujafilina* bacteriome. **(B)** Lateral-ventral view of a *C. (Cu.) cupressi*  
bacteriome. **(C)** Lateral view of a *C. (Ci.) cedri* bacteriome. **(D)** Lateral view of a *Tu. salignus*  
14 bacteriome. **(E)** Lateral-ventral view of a *Pt. persicae* bacteriome. **(F)** Ventral view of a *Tr. caudata*  
bacteriome. Thick white boxes indicate the magnified region, depicted in the top-right of each  
16 panel. The scientific name for each species along with the false colour code for each fluorescent  
probe and its target group are shown at the top-left of each panel. Scale bars from the unmagnified  
18 and magnified FISH images represent 20 and 5µm, respectively.

## 20 ***Sodalis*-like secondary symbionts**

*Sodalis*-like 16S rRNA gene sequences have been previously amplified from some  
22 Lachninae aphids, including *Eulachnus* spp., *Nippolachnus piri*, and *Cinara (Cinara) glabra*  
(*Cinara* cluster C) (Burke *et al.*, 2009). Here, we have confirmed, by 16S rRNA gene sequencing,  
24 the presence of a *Sodalis*-like secondary symbiont (hereafter **SLSS**) in different populations of  
*Eulachnus mediterraneus* (Spain) and *Eulachnus rileyi* (Austria, France, and Spain) (**Table S1**).

Additionally, using a specific primer designed to target the 16S rRNA gene of the SLSS of  
2 *Eulachnus* spp. (see **Materials and Methods**), we detected and sequenced SLSS 16S rRNA gene  
amplification products from all the collected *Cinara* (*Schizolachnus*) *obscurus* (clade B)  
4 populations from Austria, France, and Spain, which were almost identical to each other, pointing  
towards this symbiont being fixed in this aphid species. Although we lacked enough specimens to  
6 perform FISH microscopy, we were able to amplify a sequence from a SLSS from a population of  
the closely related aphid species *Cinara* (*Schizolachnus*) *pineti*. In this species, we were able to  
8 corroborate that the SLSS was the sole secondary bacterium lineage found through a MiSeq  
amplicon sequencing of the V3-V4 region of the 16S (**Figure 4F**). A similar approach has been  
10 recently been used to successfully detect symbionts associated to *Cinara* species (Jousselin *et al.*,  
2016). By means of a Bayesian phylogenetic reconstruction, we determined that SLSSs of  
12 Lachninae aphids constitute at least four different lineages, nested within an unresolved clade made  
up of *Sodalis* bacteria, and *Sodalis*-like symbionts from different insect species (**Fig 4A**).  
14 Interestingly, the SLSS from *Eulachnus* spp. form a well-supported monophyletic clade, reinforcing  
previous results (Burke *et al.*, 2009) and pointing towards a common origin. Considering the close  
16 phylogenetic relationship of *Eulachnus* and *Essigella* (**Fig 1**; Chen, Favret, *et al.*, 2015), and the  
fact that *Essigella* has not been found associated to neither *S. symbiotica*, *Candidatus* Hamiltonella  
18 *defensa*, nor *Candidatus* Regiella insecticola endosymbionts (Russell *et al.*, 2003), we hypothesised  
that the SLSS detected in *Eulachnus* spp. could have been either fixed in the common ancestor of  
20 these two genera or right before the diversification of *Eulachnus* species. Regrettably, we were  
unable to recover any secondary symbiont's 16S rRNA gene sequence from *Essigella californica*  
22 (collected in France), neither by specific PCR nor by molecular cloning (50 colonies analysed). In  
the case of the SLSSs from both analysed *Cinara* (*Schizolachnus*) species, we found they were also  
24 recovered as a well-supported monophyletic clade, providing evidence towards their common  
origin.

Given our failure to detect sequence belonging to a secondary symbiont in *Es. californica* using the aforementioned methods, we amplified the V3-V4 region of the 16S rRNA gene and performed massive sequencing in the MiSeq Illumina platform. Surprisingly, we were unable to detect an additional bacterial lineage in *Es. californica* (**Figure S2**). This could reflect either the very low quantity of DNA belonging to the secondary endosymbiotic bacteria (relative to *Buchnera*'s), or a strong bias of the "universal" PCR primers used for this protocol towards amplifying *Buchnera*'s 16S rRNA gene.

8

**Fig 4. Location and 16S rRNA phylogenetic relationships of SLSS of Lachninae aphids. (A)**

Bayesian phylogram depicting the relationships and placement of known SLSS from aphids. The superscript H at the end of the full species name indicates the symbiont's host name was used. Strain/isolate names are indicated in grey following the species name. Bold-lettered species names indicate the species selected for FISH microscopy. Values at nodes indicate the posterior probability. An "\*" at the node indicate a posterior probability of 1. **(B-E)** FISH microscopic images of aphid embryos of selected Lachninae aphids. In panels **B** and **C**, *Buchnera* was visualised by a general bacterial probe (blue) and SLSSs by overlapping signals with a SLSS-specific probe (red). In panels **D** and **E**, the SLSSs were visualised by a general bacterial probe (red) and *Buchnera* by overlapping signals with a *Buchnera*-specific probe (green). **(B)** Lateral view of an *Eu. mediterraneus* bacteriome. **(C)** Ventral view of an *Eu. rileyi* bacteriome. **(D)** Lateral-ventral view of an *Es. californica* bacteriome. **(E)** Lateral view of a *C. (Sc.) obscurus* bacteriome. Thick white boxes indicate the magnified region, depicted in the top-right of each panel. The scientific name for each species along with the false colour code for each fluorescent probe and its target group is indicated at the top-left of each panel. Scale bars from the unmagnified and magnified FISH images represent 20 and 5  $\mu\text{m}$ , respectively. **(F)** Stacked bar plot showing the relative abundance of contigs assigned to taxonomical units. On the right, pie chart showing the

**MegaBLAST** assignment of V3-V4 contigs to reference 16S rRNA genes from aphid endosymbionts. "<1%" indicates the percentage relative to all the reads (N).

To localise the SLSS within the bacteriome, we used the *Eulachnus* SLSS specific reverse PCR primer as a probe for FISH on dissected aphid embryos (**Table S2**). We found that all individuals from both *Eu. rileyi* and *Eu. mediterraneus* harbour the SLSS inside specific bacteriocytes within the bacteriome (**Figs 4B-C and S1M-O**). Additionally, since we were unable to determine the 16S rRNA gene sequence of the putative secondary endosymbiont of *Es. californica*, we used a combination of a general bacterial and a *Buchnera*-specific probe for FISH in embryos of this aphid species. We observed that there was indeed a distinct secondary bacterial symbiont with a very similar morphology and location as that of *Eulachnus* spp. (**Figs 4D and S1P-R**). In both *Eulachnus* spp. and *Es. californica*, we found that the symbiont is somewhat underrepresented compared to *Buchnera*, similarly to what is observed for the SLSS of *N. piri* (Fukatsu *et al.*, 1998). This could be the reason why we failed to detect it in *Es. californica*, even with V3-V4 MiSeq amplicon sequencing. Regarding *C. (Sc.) obscurus*, we did not observe a staining when the SLSS probe (designed for the SLSS of *Eulachnus* spp.) was used for FISH in this aphid species. Therefore, we used the same approach as for *Es. californica*. Using a general bacterial probe in combination with a *Buchnera*-specific probe, we found that *C. (Sc.) obscurus* harbours two phylogenetically distinct spherical endosymbionts in separate bacteriocytes (**Figs 4E and S1S**). In contrast to *Eulachnus*, the SLSS bacteriocytes from *C. (Sc.) obscurus* are more abundant and located along the bacteriome surrounding *Buchnera* bacteriocytes.

## 22 “X-type” secondary symbionts

For the current study, we were able to collect two populations of *Ma. submacula* aphids. Since the an “X-type” (or **PAXS**) symbiont was suspected to be the secondary symbiont of this aphid species (Lamelas *et al.*, 2008; Burke *et al.*, 2009), we used a specific PCR assay to confirm

the presence of this endosymbiont in both populations. Through this assay, we recovered 16S rRNA  
2 gene fragments sharing 100% sequence identity with each other and >99% with other X-type  
symbionts. To facilitate phylogenetic analysis, we additionally performed molecular cloning of the  
4 16S rRNA using universal primers (**Table S2**). Additionally, through the same method, we found an  
“X-type” symbiont associated with the aphid *C. (Ci.) confinis*. A Bayesian phylogenetic analysis of  
6 the different Aphididae “X-type” symbionts revealed that these form a well-supported monophyletic  
cluster closely related to *Candidatus* Hamiltonella defensa and *Candidatus* Regiella insecticola,  
8 facultative endosymbionts from *Ac. pisum* (**Fig 5A**). Particularly, the sequences obtained from *Ma.*  
*submacula* populations from three different countries form a well-supported monophyletic clade  
10 (separate from that of *C. [Cu.] confinis*, *C. [Cupressobium] juniperi* [clade C], and *Ac. pisum*), and  
show a high sequence identity among each other (>99%). We then performed FISH analysis on *Ma.*  
12 *submacula* embryos using specific probes for *Buchnera* and X-type (see **Materials and Methods**).  
We found that all analysed individuals from both *Ma. submacula* populations contained X-type  
14 symbionts distributed along the bacteriome, both surrounding *Buchnera* bacteriocytes and in their  
own distinct ones (**Figs 5B and S1T-U**). Regarding *C. (Cu.) confinis*, we lacked enough individuals  
16 to perform FISH analysis, and therefore its localisation within the bacteriome remains  
undetermined.

### 18 **“*Candidatus* Fukatsuia” gen. nov. and “*Candidatus* Fukatsuia symbiotica” sp. nov.**

Given that X-type symbionts form a well-supported monophyletic clade with high sequence  
20 identity (>99%), we propose the specific name “*Candidatus* **Fukatsuia symbiotica**” for the lineage  
of enterobacterial symbionts found, so far, affiliated only to aphids (Hemiptera: Aphididae). *Ca.*  
22 *Fukatsuia*’s closest relative, by 16S rRNA gene sequence identity, would be *Budvicia diplopodorum*  
strain D9 (INSDC accession number HE574451.1), with which it shares 93% sequence identity. The  
24 generic name “Fukatsuia” is in honour of Dr. Takema Fukatsu (Prime Senior Researcher at the  
National Institute of Advanced Industrial Science and Technology, Japan), who has enormously

contributed to the study of aphid biology and that of their endosymbionts, with particular emphasis  
2 on his early work on secondary endosymbionts from Lachninae aphids. The specific epithet  
'symbiotica' alludes to the symbiotic habit of *Ca. Fukatsuia* bacteria.

4 In the Lachninae aphid *Ma. submacula*, "*Ca. Fukatsuia*" is found inhabiting the bacteriome  
tissue and its cell presents a filamentous shape of variable length. Its tissue localisation and cell  
6 shape in aphids other than *Ma. submacula* remains unknown. Similarly to *S. symbiotica*, different  
*Ca. Fukatsuia* lineages are of different dispensability to their hosts: being a defensive facultative  
8 symbiont (of variable degrees of protection, depending on the strain) in *Ac. pisum* (Guay *et al.*,  
2009; Heyworth and Ferrari, 2015), and being a putative co-obligate symbiont in *Ma. submacula*  
10 aphids. Co-obligate lineages of "*Ca. Fukatsuia symbiotica*" may well represent separately evolving  
units, and thus, some lineages may constitute separate species within the same genus. This could be  
12 the case for the well-supported specific lineage associated to *Ma. submacula* aphids, however  
further genome data from several "*Ca. Fukatsuia*" symbionts is needed to test this hypothesis.  
14 Currently available sequences that correspond to "*Ca. Fukatsuia symbiotica*" are deposited under  
INSDC accession numbers FJ821502.1, KP866544.1, KP866545.1, LT600381.1, EU348311.1,  
16 EU348312.1, FJ655539.1, LT600338.1, and LT600340.1.

18 **Fig 5. 16S rRNA based phylogenetic relationships of *Ca. Fukatsuia* and location of *Ca.***  
***Fukatsuia symbiotica* in *Ma. submacula*.** (A) Bayesian phylogram depicting the relationships and  
20 placement of the currently available *Ca. Fukatsuia* from aphids and selected Enterobacteriaceae,  
using *Vibrio cholerae* as an outgroup. The superscript H indicates that the symbiont's host name was  
used. (B) FISH microscopic images of a lateral view of a *Ma. submacula* bacteriome. Thick white  
22 box indicates the magnified region, depicted in the top-right of the panel. The scientific name for  
the species along with the false colour code for each fluorescent probe and its target group is shown  
24 at the top-left of the panel. Scale bars from the unmagnified and magnified FISH images represent



20 and 5  $\mu\text{m}$ , respectively.

2

## Discussion

4 Many insects maintain intimate associations with obligate endosymbiotic bacteria harboured  
in specialised organs (bacteriomes). One crucial question within the field is how do these  
6 associations evolve. One way of approaching this question is through the study of “recently”  
acquired endosymbionts. In the Lachninae subfamily of aphids, it has previously been proposed that  
8 an ancient loss of the riboflavin biosynthetic capability by *Buchnera* promoted the settlement of a  
co-obligate secondary endosymbiont (putatively *S. symbiotica*) in the LLCA (Manzano-Marín and  
10 Latorre, 2014; Manzano-Marín *et al.*, 2016). Yet, various extant members of this subfamily have  
been found to be associated to bacterial taxa phylogenetically distinct from *S. symbiotica* (Lamelas  
12 *et al.*, 2008; Burke *et al.*, 2009). Therefore, the study of secondary endosymbionts within this  
subfamily is expected to give important clues regarding symbiont establishment and transition from  
14 facultative to co-obligate relationships. However, the studies on the symbiotic systems of aphids  
belonging to the Lachninae have been hampered by the lack of an evolutionary framework to  
16 correctly interpret the genomic and metabolic changes, as well as their links with the different  
stages of the transformation process towards an obligate intracellular lifestyle (Pérez-Brocal *et al.*,  
18 2006; Lamelas, Gosalbes, Manzano-Marín, *et al.*, 2011; Lamelas, Gosalbes, Moya, *et al.*, 2011;  
Manzano-Marín and Latorre, 2014).

20 In this work, we have explored the diversity, phylogenetic relationships, and location of  
different secondary endosymbionts within key members of the Lachninae subfamily. This has  
22 enabled us to propose an evolutionary scenario for the settlement, “stable” internalisation into  
distinct bacteriocytes, and replacements of the original secondary co-obligate endosymbiont from  
24 the LLCA (**Fig 6**). Firstly, with a combination of specific PCR assays, 16S rRNA gene sequencing,  
and FISH microscopy, we determined that all analysed specimens indeed harbour fixed secondary

endosymbionts at the population/species level. This fact, in combination with previously published  
2 microscopic (Buchner, 1953; Fukatsu and Ishikawa, 1998; Fukatsu *et al.*, 1998; Lamelas *et al.*,  
2008; Pyka-Fościak and Szklarzewicz, 2008; Michalik *et al.*, 2014) and molecular (Pérez-Brocal *et*  
4 *al.*, 2006; Burke *et al.*, 2009; Lamelas, Gosalbes, Manzano-Marín, *et al.*, 2011; Lamelas, Gosalbes,  
Moya, *et al.*, 2011; Manzano-Marín and Latorre, 2014; Manzano-Marín *et al.*, 2016) data from  
6 Lachninae aphids, provides strong evidence for the dependence of members of this subfamily on  
co-obligatory secondary endosymbionts, putatively due to the ancient pseudogenisation of the  
8 riboflavin biosynthetic genes in the *Buchnera* harboured by the LLCA, which lived at least some  
85-106 Mya. The detection of *S. symbiotica* in different aphid species from at least six Lachninae  
10 genera across all five tribes, along with the genomic data from three strains of this symbiont at  
different stages of the genome reduction process (Lamelas, Gosalbes, Manzano-Marín, *et al.*, 2011;  
12 Manzano-Marín and Latorre, 2014; Manzano-Marín *et al.*, 2016), point towards an early  
establishment of *S. symbiotica* as co-obligate in the LLCA. While spherical and found consistently  
14 inside bacteriocytes (with a highly reduced genome) in *Tu. salignus* and *C. (Ci.) cedri*, the  
filamentous and broadly distributed (with a mildly-reduced genome) *S. symbiotica* from *C. (Cu.)*  
16 *tujafilina* would preserve the traits of the putative “ancient” *S. symbiotica* from the LLCA. This  
hypothesis would be consistent with the high level of genomic, metabolic, and phenotypic  
18 similarity of the co-obligate *S. symbiotica* from *C. (Cu.) tujafilina* and the facultative *S. symbiotica*  
from *Ac. pisum* (Moran *et al.*, 2005; Lamelas *et al.*, 2008; Burke and Moran, 2011; Manzano-Marín  
20 and Latorre, 2014). We find this scenario to be most parsimonious, as it would require one single  
event of infection with a shared *S. symbiotica* ancestor in the LLCA followed by at least four  
22 “stable” internalisations of *S. symbiotica* into bacteriocytes. This ancient secondary symbiont would  
have then undergone at least six independent events of symbiont replacement. An alternative  
24 scenario would require additional events of symbiont replacement with distinct *S. symbiotica* strains  
in specific Lachninae lineages. This last scenario is suggested by the lack of general congruency

between *Buchnera* and *S. symbiotica* 16S rRNA gene phylogenies and by the multiple *S. symbiotica* lineages recovered from the 16S rRNA gene phylogeny in **Fig 2B**. However, this pattern also suggests different rates of sequence evolution of the *S. symbiotica* symbionts, possibly driven by changes in the *Buchnera*-*S. symbiotica* relationship, such as metabolic pathway splits (e.g. tryptophan) and/or changes in the symbiont's tissue tropism (Manzano-Marín *et. al.*, 2016). We expect that further sequencing of complete genomes from several Lachninae aphids will help clarify this.

**Fig 6. Proposed evolutionary scenario for the establishment, "stable" internalisation, and replacement of secondary co-obligate endosymbionts across the Lachninae.** Cladogram displaying the relationships of Lachninae lineages by genera. Coloured boxes shading monophyletic clades as well as vertical lines on the right side delimit the five tribal clades (as depicted in **Fig 1**). Divergence time range estimates (in Mya, and showed at tree nodes) are based on (Chen, Favret, *et al.*, 2015). Incoming lines on branches symbolise the acquisition/replacement of co-obligate secondary symbionts. The outgoing line at the root of the tree stands for the loss of the riboflavin ( $B_2$ ) biosynthetic genes in the *Buchnera* from the LLCA. Green, blue, and grey branches represent lineages where *Ca. Fukatsuia*, a SLSS, or other bacterial symbiont have replaced the original *S. symbiotica* symbiont, respectively. Red branches with an arrowhead pointing to them reflect the "stable" internalisation of *S. symbiotica* into distinct bacteriocytes. At the leaves, shapes symbolising the bacterial endosymbionts' cell shapes according to the key (bottom-left) and cartoons of selected aphids from the different Lachninae genera are showed. SS= *S. symbiotica*, X= *Ca. Fukatsuia*, Ars=*Arsenophonus*, SMLSS= *Serratia marcescens*-like secondary symbiont, GLSS= *Gilliamella*-like secondary symbiont, SL= SLSS, ?=unknown.

Within the Lachnini tribe, there could have been either one or two independent events of "stable" internalisation and confinement of *S. symbiotica* into distinct bacteriocytes. The latter hypothesis is supported by the lack of congruency between *Buchnera* and *S. symbiotica* lineages from *Pt. persicae* and *Lachnus* spp., suggesting separate events of genome reduction of *S. symbiotica* in these two aphid lineages. Regarding the *Lachnus* genus, microscopic observations of bacteriocytes from *La. roboris* have revealed that it keeps a vertically transmitted association with two spherical-shaped bacteria (presumably *Buchnera* and *S. symbiotica*) residing in separate bacteriocytes and a third filamentous bacterial symbiont residing in distinct bacteriocytes, whose identity remains unknown (Buchner, 1953). If this tertiary symbiotic bacterium was established in the common ancestor of *La. roboris* and *La. quercihabitans*, it could explain the longer branches, relative to *La. tropicalis* (**Fig 2A and B**), given that the presence of an additional symbiont could facilitate the process of genomic erosion in the *S. symbiotica* symbiont. Such a phenomenon was observed in those *Buchnera* strains from Lachninae species that have established co-obligate associations with *S. symbiotica* (Manzano-Marín *et al.*, 2016).

Also, we have confirmed that *Ma. submacula* aphids indeed harbour *Ca. Fukatsuia* bacteria (which belong to the group of symbionts previously referred to as "X-type" or PAXS) and determined its location within aphid embryos. We found that *Ca. Fukatsuia* was present in all of the microscopy analysed individuals, which, in combination with previous analyses detecting the presence of these symbionts in a Spanish (Lamelas *et al.*, 2008), and a UK (Burke *et al.*, 2009) population, points towards its obligate status. The morphology and location of *Ca. Fukatsuia* (**Fig 5B and S1T-U**) resembles that observed for facultative endosymbionts of other aphids (Moran *et al.*, 2005), similarly to what is observed for the co-obligate *S. symbiotica* from *C. (Cu.) tujafilina* (Lamelas *et al.*, 2008; Manzano-Marín and Latorre, 2014). This suggests that *Ca. Fukatsuia* from *Ma. submacula* has not yet undergone a massive genome reduction, contrary to what is observed in the pleomorphic *S. symbiotica* of *C. (Ci.) cedri* (Lamelas, Gosalbes, Manzano-Marín, *et al.*, 2011)

and *Tu. salignus* (Manzano-Marín *et al.*, 2016). This, in combination with the lack of a *S.*  
2 *symbiotica* endosymbiont, points toward a replacement of the “ancient” secondary co-obligate  
endosymbiont which occurred at least some 77-99 Mya in the branch leading to *Ma. submacula*. It  
4 is important to note that *Buchnera* strains from aphids identified as *Ma. submacula* form at least  
two phylogenetically distinct lineages (**Fig 2A**): one sister to *Maculolachnus sijpkensis* and one  
6 sister to this *Ma. submacula*+*Ma. sijpkensis* clade. Thus, in the current work, we refer to the latter  
as the one associated to *Ca. Fukatsuia*. Given that no *cox1* gene sequence is provided for the *Ma.*  
8 *submacula* whose *Buchnera* strain is recovered as sister to that of *Ma. sijpkensis*, we are unable to  
judge if these the two *Buchnera* lineages have been indeed isolated from the same species or if the  
10 polyphyly of *Buchnera* strains from *Ma. submacula* is due to wrong taxonomic identification.

Regarding the Stomaphidini, we postulate that at least two events of symbiont replacement  
12 have occurred. *Stomaphis pini* and *Stomaphis quercisucta* (both belonging to the same clade:  
*Stomaphis* clade A) have been found to be associated with *S. symbiotica* (Burke *et al.*, 2009; Chen,  
14 Wang, *et al.*, 2015), and microscopic investigations into *St. quercus* have revealed that this species  
houses three vertically-transmitted endosymbiotic bacteria: *Buchnera* plus two secondary symbionts  
16 which apparently reside inside the same secondary bacteriocytes (Buchner, 1953; Pyka-Fościak and  
Szklarzewicz, 2008). These could be an *Arsenophonus* and/or a *Gilliamella*-like secondary  
18 symbiont (**Figure S3**), both of which have been found associated to different Polish populations of  
this aphid species (Burke *et al.*, 2009). In addition, both *Stomaphis aphananthae* and *St. yanonis* are  
20 associated with SMLSSs (Burke *et al.*, 2009), suggesting an establishment of this symbiont in the  
branch leading to the clade comprising these two species (the unresolved *Stomaphis* clade C).  
22 Furthermore, microscopic analyses of *St. yanonis* bacteriomes have revealed this species indeed  
houses a tubular secondary symbiont, putatively SMLSS, in separate bacteriocytes located on the  
24 surface of the bacteriome "core" formed by the *Buchnera* bacteriocytes (Fukatsu and Ishikawa,  
1993, 1998). Consequently, we propose at least two events of acquisition of a new endosymbiont:

one before the diversification of the clade comprising *St. cupressi* (*Stomaphis* clade A) and another  
one before the expansion of the large unresolved clade including *St. yanonis* (*Stomaphis* clade C)  
(**Fig 2A**).

With respect to the Tramini+Tuberolachnini clade, all currently analysed members have  
been found to be associated with *S. symbiotica* (Burke *et al.*, 2009), except for *N. piri*, which  
contains a putatively pleomorphic SLSS housed inside separate bacteriocytes (Fukatsu and  
Ishikawa, 1993, 1998; Fukatsu *et al.*, 1998; Burke *et al.*, 2009). In the case of both *Tu. salignus* and  
*Tr. caudata* (which started diverging at least some 47-69 Mya), the *S. symbiotica* symbiont is found  
exclusively within bacteriocytes (**Figs 3D, F, S1H-I, and K-L**). However, the cell shape of the  
endosymbionts is strikingly different. While in *Tu. salignus* they occur as large spherical-shaped  
cells, in *Tr. caudata* the symbionts have a small rod-shaped morphology, resembling the cell shape  
of free-living *Serratia* strains. This could be indicative of this bacterium being in the very first  
stages of "stable" internalisation into bacteriocytes, while still preserving its rod shape and  
putatively having a genome resembling closely that of *S. symbiotica* from *C. (Cu.) tujafilina*, rather  
than that of *Tu. salignus*.

In regards to the Eulachnini, most *Cinara* spp. have been consistently found associated to *S.*  
*symbiotica* strains. Microscopic investigations of *Cinara (Cinara) pini* (clade A) and *C. (Ci.) cedri*  
have revealed they indeed harbour a pleomorphic secondary endosymbiotic bacterium obligatorily  
inside bacteriocytes (Fukatsu *et al.*, 1998) (**Figs 3C and S1E-G**), and in the case of the latter,  
genomic-based metabolic inference has established that both *Buchnera* and *S. symbiotica* are  
required for the biosynthesis of various essential nutrients (Gosalbes *et al.*, 2008; Lamelas,  
Gosalbes, Manzano-Marín, *et al.*, 2011). Additionally, a high level of congruency between the  
phylogenetic relationships of *Buchnera* and *S. symbiotica* strains from clade A *Cinara* (**Fig 2A and**  
**B**) suggests a single event of drastic genome reduction followed by divergence, similar to what is  
observed for *Buchnera*. On the contrary, *S. symbiotica* from clade B *Cinara* do not show this

congruent pattern, pointing possibly to independent events of drastic genome reduction. Within  
2 *Cinara* clade B, *C. (Sc.) obscurus* would represent a case of symbiont replacement by a SLSS,  
which is present obligatorily inside bacteriocytes (**Fig 4E and S1S**). This SLSS is also present as in  
4 the closely related *C. (Sc.) pineti* (in which it is the only other symbiont present), and according to a  
previous study, this species also presents a spherical secondary endosymbiotic bacterium  
6 (presumably the detected SLSS) which is vertically transmitted in both oviparous and viviparous  
generations (Michalik *et al.*, 2014). Taken together, this suggests the replacement of *S. symbiotica*  
8 by a SLSS in the common ancestor of these two *Cinara (Schizolachnus)* species. Whether or not  
this symbiont is widespread within the *Cinara (Schizolachnus)* subgenus remains to be explored. As  
10 most *Cinara*, *C. (Cu.) tujafilina* and *C. (Cu.) cupressi*, are associated to *S. symbiotica* strains.  
However, both the location and 16S rRNA gene sequence of these more closely resemble the  
12 facultative strains from Aphidinae aphids (**Figs 2B, 3A-B, S1A-D**; Moran *et al.*, 2005). Genome-  
based metabolic inference has provided evidence towards the obligate status of *S. symbiotica* in *C.*  
14 *(Cu.) tujafilina*, given the loss of the riboflavin biosynthetic capability of *Buchnera*, an essential co-  
factor now synthesised by *S. symbiotica* (Manzano-Marín and Latorre, 2014). This, in addition to  
16 the consistent association of these two *Cinara (Cupressobium)* species with *S. symbiotica*, led us to  
infer that these aphids do indeed keep an obligate association with closely related secondary  
18 endosymbiotic strains. Within *Cinara* clade C, evidence of at least one species being affiliated to a  
SLSS (**Fig 4A**, *Cinara [Ci.] glabra*) and two to *Ca. Fukatsuia* (**Fig 5A**, *Cinara [Cu.] confinis* and  
20 *Cinara [Cu.] juniperi*), rather than *S. symbiotica*, suggests that some events of symbiont  
replacement have occurred in this group of species. This could have been facilitated due to the niche  
22 occupied by *S. symbiotica*, being similar to that of facultative endosymbionts of *Ac. pisum*  
(Sandström *et al.*, 2001; Moran *et al.*, 2005; Sakurai *et al.*, 2005; Tsuchida *et al.*, 2005, 2010).  
24 Finally, we propose a symbiont replacement event by a SLSS in the branch leading to the  
*Eulachnus* species. Consistent with previous observations in *Eu. rileyi* (Michalik *et al.*, 2014), we

found that both *Eu. rileyi* and *Eu. mediterraneus* species harbour spherical SLSSs in separate  
2 bacteriocytes, spatially-arranged in a very similar fashion (**Fig 4B, C, S1M, O**). Also, even though  
we were unable to recover a 16S rRNA gene sequence belonging to a bacterial taxon other than  
4 *Buchnera* in *Es. californica* (in a greater abundance than 1%), we were able to detect by FISH  
microscopy the presence of spherical bacterial endosymbionts residing in distinct bacteriocytes,  
6 localised similarly to those inhabited by SLSSs in *Eulachnus* spp. (**Fig 4D, SR**). Therefore, pending  
further studies, it could be suggested that the secondary symbiont found in *Es. californica* could  
8 belong to the same lineage as the SLSSs of *Eulachnus* species.

A feature we observed repeatedly was the change in the endosymbionts' tissue tropism along  
10 distantly related aphid species. This changes included both bacteriocyte arrangement within the  
bacteriome and “stable” internalisation of the secondary endosymbionts in distinct bacteriocytes. In  
12 the case of *S. symbiotica* and *Buchnera*, genome data is available for three species. Regarding the  
bacteriocyte arrangement within the bacteriome, a similar case has been previously reported within  
14 spittlebugs (Auchenorrhyncha: Cercopoidea). Within this superfamily, species belonging to the tribe  
Philaenini have undergone symbiont replacement of the ancient *Candidatus* Zinderia endosymbiont  
16 by a *Sodalis*-like symbiont (Koga *et. al.*, 2013). This shift in co-obligate symbiont is also  
accompanied by a newly evolved type of bacteriocyte with a different arrangement. In Lachninae  
18 aphids, changes in the bacteriocyte arrangement within the bacteriome could also be linked to  
symbiont replacement events, and/or changes in the interdependent metabolic “wiring” of their  
20 symbionts which promotes “stable” internalisation into distinct bacteriocytes in a non-deterministic  
matter. Regarding the latter, we have previously postulated that these changes in the interdependent  
22 metabolic “wiring” could also be involved in the “stable” internalisation into distinct bacteriocytes  
(Manzano-Marín *et. al.*, 2016), which speculatively could be triggered by the constraints on the  
24 exchange of certain intermediary metabolites. Developmentally, this shift in tissue tropism would  
involve a change in the development and colonisation of the bacteriome by the secondary



symbionts. In *Ac. pisum*, *S. symbiotica* acquires a broad distribution in the bacteriome (e.g. occupying both sheath cells, secondary bacteriocytes, and co-infecting *Buchnera*'s) following the formation of sheath cells (Koga *et. al.*, 2012). Before this, and after bacteriocyte cellularisation and symbiont sorting, the two "stably" internalised symbionts of the different Lachninae aphids would putatively remain confined to their own bacteriocytes until vertical symbiont transmission.

In summary, we propose an evolutionary framework which should assist in future studies on the Lachninae, a symbiont-diverse subfamily. Our findings reveal a dynamic pattern for the evolutionary history of "recently" established endosymbionts, thus contributing to a better understanding of how mutualism in endosymbiotic associations can evolve. We believe that further studies directed towards the bacteriome development and its colonisation by endosymbiotic bacteria in species from the Lachninae subfamily, could also provide hints towards the evolution of new spatial arrangements and even type of bacteriocytes. The role these recently-acquired bacteria have played in the adaptation of their aphid hosts to different niches/feeding sites/plants and their role in speciation in this peculiar subfamily remains to be explored.

## 16 **Materials and Methods**

### **Aphid collection and storage**

18 All aphids used for this study were collected in various locations around Rennes (France), Vienna (Austria), and Valencia (Spain). Collection details can be found in **Table S1**. Aphids used for DNA extraction were stored at -20°C in absolute ethanol inside a 1.5 mL Eppendorf tube. Aphids used for fluorescence *in situ* hybridisation experiments were dissected in absolute ethanol to extract embryos. These were then directly transferred to modified Carnoy's fixative (6 chloroform : 3 absolute ethanol : 1 glacial acetic acid) and left overnight, following (Koga *et al.*, 2009) protocol to quench autofluorescence. Briefly, fixed embryos were washed with absolute ethanol and transferred into a 6% solution of H<sub>2</sub>O<sub>2</sub> diluted in absolute ethanol and were then left in this solution

for two to six weeks (changing the solution every three days). When bleached, they were washed  
2 twice with absolute ethanol and stored at -20°C.

### Fluorescence *in situ* hybridisation

4 Hybridisation of aphid embryos was performed overnight at 28°C in standard hybridisation  
buffer (20mM Tris-HCl [pH 8.0], 0.9 M NaCl, 0.01% SDS, and 30% formamide) and then washed  
6 (20mM Tris-HCl [pH 8.0], 5mM EDTA, 0.1 M NaCl, and 0.01% SDS) before slide preparation.  
The slides were examined using a confocal laser scanning microscope (TCS SP5 X, Leica; and  
8 FV1000, Olympus). A list of specific probes used for each aphid species is available in **Table S2**.  
*Buchnera*, *S. symbiotica*, and *Ca. Fukatsuia* competitive probes were designed based on (Gómez-  
10 Valero *et al.*, 2004) and adapted to match the target bacterial strain. The *Eulachnus* SLSS probe was  
designed based on (Attardo *et al.*, 2008), adapted to match the target strain. The embryos from at  
12 least 10 individuals were analysed per sample.

### 16S rRNA gene PCR, cloning, and sequencing

14 Since all endosymbionts detected in Lachninae members so far are bacteria, we used the  
primers 16SA1 and 16SB1 (Fukatsu and Nikoh, 1998) to amplify partial 16S rRNA genes (*circa* 1.5  
16 kbp) for cloning and sequencing. This strategy was adopted in selected cases to facilitate  
phylogenetic reconstruction. Resulting amplicons were cloned into the pGEM-T Easy Vector  
18 (Promega) and SP6 (5'-ATTTAGGTGACACTATAG-3') and T7 (5'-  
TAATACGACTCACTATAGGG-3') primers were used for amplification and sequencing of the  
20 cloned DNA (at least 5 clones from each species). Specific primers for either *Buchnera* or *S.*  
*symbiotica* were designed based on the FISH probes. Specific PCR reactions and sequencing were  
22 done mainly to confirm the presence of the secondary endosymbionts. In the case of the SLSS and  
*Ca. Fukatsuia*, specific primers were designed based on (Attardo *et al.*, 2008) (“*Sodalis* specific”)  
24 and (Guay *et al.*, 2009) (“PAXSF”), respectively. For a full list of primers pairs and PCR conditions  
see **Table S2**. All sequences have been uploaded to the European Nucleotide Archive and are

pending accession (temporarily available at <https://figshare.com/s/8eb9686e546394547fe4>).

## 2 **MiSeq sequencing of the V3-V4 region of the 16S rRNA gene from bacteria associated to *Es. Californica* and *C. (Sc.) pineti*.**

4           Using the same DNA extracted for PCR and cloning, amplification and sequencing of the  
V3-V4 region (using standard Illumina primers 5'-CCTACGGGNGGCWGCAG-3' and 5'-  
6 GACTACHVGGGTATCTAATCC-3') of the 16S rRNA gene was performed in an Illumina MiSeq  
machine (paired-end 2x300 bp) at the FISABIO Center (Generalitat Valenciana). Next, **mothur**  
8 v1.31.2 (Schloss *et. al.*, 2009) was used for merging of the paired-ends reads and taxonomic  
assignment of the resulting contigs. Briefly, reads were first quality trimmed using **fastx\_toolkit**  
10 v0.0.14 ([http://hannonlab.cshl.edu/fastx\\_toolkit/](http://hannonlab.cshl.edu/fastx_toolkit/), last accessed November 9, 2016). Next, we joined  
the overlapping paired ends reads using the *make.contigs* function of **mothur** and filtered out all  
12 contigs shorter than 420 bps. Then, contigs were aligned to the **SILVA NR99** v128 database (Quast  
*et. al.*, 2013) and those with less than 90% of their length aligned were filtered out. After another  
14 step of redundancy removal, rare sequences (possibly resulting from sequencing errors) were  
merged with frequent unique sequences with a mismatch no greater than 2 bp (*precluster* function).  
16 Resulting contigs were then screened for chimeric sequences using (*chimera.uchime* function).  
Remaining contigs were then taxonomically assigned to genus level using the *classify.seqs* function  
18 and the **SILVA NR99** v128 database (cutoff=90). Lastly, the remaining unclassified sequences  
(namely unclassified Enterobacteriaceae) that exceeded 1% of the total contigs were used for a  
20 **MegaBLAST** (Zhang *et. al.*, 2004) search against a database of representatives including all 16S  
aphid endosymbiont sequences available to date. The best hit for each read, if this surpassed 94.5%  
22 identity, was used for genus-level assignment.

## **Phylogenetic analyses**

24           All phylogenetic analyses were performed as follows. First **SSU-ALIGN** v0.1 (Nawrocki,  
2009) was used to align 16S rRNA sequences, followed by visual inspection of the alignments in  
26 **AliView** v1.17.1 (Larsson, 2014). Then, **GBlocks** v0.91b (Castresana, 2000) was used to eliminate

poorly aligned positions and divergent regions with the option '-b5=h' to allow half of the positions  
2 with a gap. The final alignments were transformed into nexus format (available online at  
<https://figshare.com/s/8eb9686e546394547fe4>) for phylogenetic analysis in **MrBayes** v3.2.5  
4 (Ronquist *et al.*, 2012) under the GTR+I+G model. Two independent runs, each with four chains  
(three "heated", one "cold"), were run for 5,000,000 generations discarding the first 25% as burn-in  
6 and checked for convergence. Visualisation and tree-editing was done in **FigTree** v1.4.1  
(<http://tree.bio.ed.ac.uk/software/figtree/>, last accessed November 9, 2016) and **Inkscape** v0.91  
8 (<http://www.inkscape.org/en/>, last accessed November 9, 2016), respectively. For a full list of  
accession numbers of sequences used for phylogenetic analyses see **Table S3**.

## 10 **Acknowledgements**

The authors would like to acknowledge emeritus professor José Manuel Michelena Saval,  
12 professor Joaquin Baixeras, Nicolás Pérez Hidalgo, Christelle Buchard, and Evelyne Turpeau for  
their invaluable and expert help in collection and/or taxonomic identification of aphid samples.  
14 Also, we thank and acknowledge artist/scientist Jorge Mariano Collantes Alegre for the aphid  
cartoons in **Fig 6**. This work has been funded by the Ministerio de Economía y Competitividad  
16 (Spain) co-financed by FEDER funds [BFU2015-64322-C2-01-R to A.L.]; the European  
Commission [Marie Curie FP7 PITN-GA-2010-264774-SYMBIOMICS to A.M.M]; the Consejo  
18 Nacional de Ciencia y Tecnología (Mexico) [Doctoral scholarship CONACYT 327211/381508 to  
A.M.M.]; and the Austrian Science Fund [project no. P22533-B17 to M.H.]. The Plant Health and  
20 Environment department of INRA is also acknowledged for financial support to JC Simon. The  
funders had no role in study design, data collection and analysis, decision to publish, or preparation  
22 of the manuscript. The authors declare no conflict of interest.

## **References**

24 Attardo, G.M., Lohs, C., Heddi, A., Alam, U.H., Yildirim, S., and Aksoy, S. (2008) Analysis of milk  
gland structure and function in *Glossina morsitans*: Milk protein production, symbiont  
26 populations and fecundity. *J. Insect Physiol.* 54: 1236–1242.

- Blackman, R.L. and Eastop, V.F. (2006) Aphids on the world's herbaceous plants and shrubs, 1st edn. Chichester, UK: John Wiley & Sons, Ltd. and the Natural History Museum (London).
- Blackman, R.L. and Eastop, V.F. (1994) Aphids on the world's trees: An identification and information guide, 1st edn. Wallingford, UK: CAB International and the Natural History Museum (London).
- Buchner, P. (1953) Endosymbiose der tiere mit pflanzlichen mikroorganismen, 1st edn. Basel, DE: Birkhäuser Basel.
- Burke, G.R. and Moran, N.A. (2011) Massive genomic decay in *Serratia symbiotica*, a recently evolved symbiont of aphids. *Genome Biol. Evol.* 3: 195–208.
- Burke, G.R., Normark, B.B., Favret, C., and Moran, N.A. (2009) Evolution and diversity of facultative symbionts from the aphid subfamily Lachninae. *Appl. Environ. Microbiol.* 75: 5328–5335.
- Castresana, J. (2000) Selection of conserved blocks from multiple alignments for their use in phylogenetic analysis. *Mol. Biol. Evol.* 17: 540–52.
- Chen, R., Favret, C., Jiang, L., Wang, Z., and Qiao, G. (2015) An aphid lineage maintains a bark-feeding niche while switching to and diversifying on conifers. *Cladistics* In Press.
- Chen, R., Wang, Z., Chen, J., and Qiao, G.-X. (2015) Avoidance and potential remedy solutions of chimeras in reconstructing the phylogeny of aphids using the 16S rRNA gene of *Buchnera*: a case in Lachninae (Hemiptera). *Int. J. Mol. Sci.* 16: 20152–20167.
- Degnan, P.H., Leonardo, T.E., Cass, B.N., Hurwitz, B., Stern, D., Gibbs, R.A., *et al.* (2009) Dynamics of genome evolution in facultative symbionts of aphids. *Environ. Microbiol.* 12: 2060–2069.
- Degnan, P.H., Yu, Y., Sisneros, N., Wing, R.A., and Moran, N.A. (2009) *Hamiltonella defensa*, genome evolution of protective bacterial endosymbiont from pathogenic ancestors. *Proc. Natl. Acad. Sci.* 106: 9063–9068.
- von Dohlen, C.D. and Moran, N.A. (2000) Molecular data support a rapid radiation of aphids in the Cretaceous and multiple origins of host alternation. *Biol. J. Linn. Soc.* 71: 689–717.
- Favret, C. (2016) Aphid Species File. Version 5.0/5.0. [12 Dec 2016] [WWW document]. URL. <http://aphid.speciesfile.org>.
- Fukatsu, T., Aoki, S., Kurosu, U., and Ishikawa, H. (1994) Phylogeny of Cerataphidini aphids revealed by their symbiotic microorganisms and basic structure of their Galls - Implications for host-symbiont coevolution and evolution of sterile soldier castes. *Zoolog. Sci.* 11: 613–623.
- Fukatsu, T. and Ishikawa, H. (1992) A novel eukaryotic extracellular symbiont in an aphid, *Astegopteryx styraci* (Homoptera, Aphididae, Hormaphidinae). *J. Insect Physiol.* 38: 765–773.
- Fukatsu, T. and Ishikawa, H. (1998) Differential immunohistochemical visualization of the primary and secondary intracellular symbiotic bacteria of aphids. *Appl. Entomol. Zool.* 33: 321–326.

- 2 Fukatsu, T. and Ishikawa, H. (1993) Occurrence of Chaperonin 60 and Chaperonin 10 in primary  
and secondary bacterial symbionts of aphids: Implications for the evolution of an  
endosymbiotic system in aphids. *J. Mol. Evol.* 36: 568–577.
- 4 Fukatsu, T. and Nikoh, N. (1998) Two intracellular symbiotic bacteria from the mulberry psyllid  
*Anomoneura mori* (Insecta, Homoptera). *Appl. Environ. Microbiol.* 64: 3599–606.
- 6 Fukatsu, T., Nikoh, N., Kawai, R., and Koga, R. (2000) The secondary endosymbiotic bacterium of  
the pea aphid *Acyrtosiphon pisum* (Insecta: Homoptera). *Appl. Environ. Microbiol.* 66: 2748–  
8 2758.
- Fukatsu, T., Tsuchida, T., Nikoh, N., and Koga, R. (2001) *Spiroplasma* symbiont of the pea aphid,  
10 *Acyrtosiphon pisum* (Insecta: Homoptera). *Appl. Environ. Microbiol.* 67: 1284–1291.
- Fukatsu, T., Watanabe, K., and Sekiguchi, Y. (1998) Specific detection of intracellular symbiotic  
12 bacteria of aphids by oligonucleotide-probed *in situ* hybridization. *Appl. Entomol. Zool.* 33:  
461–472.
- 14 Gómez-Valero, L., Soriano-Navarro, M., Perez-Brocal, V., Heddi, A., Moya, A., Garcia-Verdugo,  
J.M., and Latorre, A. (2004) Coexistence of *Wolbachia* with *Buchnera aphidicola* and a  
16 secondary symbiont in the aphid *Cinara cedri*. *J. Bacteriol.* 186: 6626–6633.
- Gosalbes, M.J., Lamelas, A., Moya, A., and Latorre, A. (2008) The striking case of tryptophan  
18 provision in the cedar Aphid *Cinara cedri*. *J. Bacteriol.* 190: 6026–6029.
- Guay, J.-F., Boudreault, S., Michaud, D., and Cloutier, C. (2009) Impact of environmental stress on  
20 aphid clonal resistance to parasitoids: Role of *Hamiltonella defensa* bacterial symbiosis in  
association with a new facultative symbiont of the pea aphid. *J. Insect Physiol.* 55: 919–926.
- 22 van Ham, R.C.H.J., Kamerbeek, J., Palacios, C., Rausell, C., Abascal, F., Bastolla, U., *et al.* (2003)  
Reductive genome evolution in *Buchnera aphidicola*. *Proc. Natl. Acad. Sci.* 100: 581–586.
- 24 Heyworth, E.R. and Ferrari, J. (2015). A facultative endosymbiont in aphids can provide diverse  
ecological benefits. *J. Evol. Biol.*, 28:1753–1760.
- 26 Jouselin, E., Clamens, A.-L., Galan, M., Bernard, M., Maman, S., Gschloessl, B., *et al.* (2016)  
Assessment of a 16S rRNA amplicon Illumina sequencing procedure for studying the  
28 microbiome of a symbiont-rich aphid genus. *Mol. Ecol. Resour.* 16: 628–640.
- Jouselin, E., Desdevises, Y., and Coeur d’acier, A. (2009) Fine-scale cospeciation between  
30 *Brachycaudus* and *Buchnera aphidicola*: bacterial genome helps define species and  
evolutionary relationships in aphids. *Proc. R. Soc. B Biol. Sci.* 276: 187–196.
- 32 Koga, R., Tsuchida, T., and Fukatsu, T. (2009) Quenching autofluorescence of insect tissues for *in*  
*situ* detection of endosymbionts. *Appl. Entomol. Zool.* 44: 281–291.
- 34 Koga, R., Meng, X.-Y., Tsuchida, T., & Fukatsu, T. (2012). Cellular mechanism for selective  
vertical transmission of an obligate insect symbiont at the bacteriocyte-embryo interface.  
36 *Proceedings of the National Academy of Sciences*, 109: E1230–E1237.

- 2 Koga, R., Bennett, G. M., Cryan, J. R., and Moran, N. A. (2013). Evolutionary replacement of  
obligate symbionts in an ancient and diverse insect lineage. *Environ. Microbiol.*, 15: 2073–  
2081.
- 4 Lamelas, A., Gosalbes, M.J., Manzano-Marín, A., Peretó, J., Moya, A., and Latorre, A. (2011)  
*Serratia symbiotica* from the aphid *Cinara cedri*: A missing link from facultative to obligate  
6 insect endosymbiont. *PLoS Genet.* 7: e1002357.
- Lamelas, A., Gosalbes, M.J., Moya, A., and Latorre, A. (2011) New clues about the evolutionary  
8 history of metabolic losses in bacterial endosymbionts, provided by the genome of *Buchnera*  
*aphidicola* from the aphid *Cinara tujafilina*. *Appl. Environ. Microbiol.* 77: 4446–4454.
- 10 Lamelas, A., Perez-Brocal, V., Gomez-Valero, L., Gosalbes, M.J., Moya, A., and Latorre, A. (2008)  
Evolution of the secondary symbiont “*Candidatus Serratia symbiotica*” in aphid species of the  
12 subfamily Lachninae. *Appl. Environ. Microbiol.* 74: 4236–4240.
- Larsson, A. (2014) AliView: a fast and lightweight alignment viewer and editor for large datasets.  
14 *Bioinformatics* 30: 3276–3278.
- Liu, L., Huang, X., Zhang, R., Jiang, L., and Qiao, G. (2013) Phylogenetic congruence between  
16 *Mollitrichosiphum* (Aphididae: Greenideinae) and *Buchnera* indicates insect-bacteria parallel  
evolution. *Syst. Entomol.* 38: 81–92.
- 18 Manzano-Marín, A. and Latorre, A. (2014) Settling Down: The genome of *Serratia symbiotica* from  
the aphid *Cinara tujafilina* zooms in on the process of accommodation to a cooperative  
20 intracellular life. *Genome Biol. Evol.* 6: 1683–1698.
- Manzano-Marín, A., Simon, J.-C., and Latorre, A. (2016) Reinventing the wheel and making it  
22 round again: Evolutionary convergence in *Buchnera* – *Serratia* symbiotic consortia between  
the distantly related Lachninae aphids *Tuberolachnus salignus* and *Cinara cedri*. *Genome Biol.*  
24 *Evol.* 8: 1440–1458.
- Meseguer, A.S., Coeur d’acier, A., Genson, G., and Jousset, E. (2015) Unravelling the historical  
26 biogeography and diversification dynamics of a highly diverse conifer-feeding aphid genus. *J.*  
*Biogeogr.* 88: 1482–1492.
- 28 Michalik, A., Szklarzewicz, T., Janakowska, W., and Wieczorek, K. (2014) Endosymbiotic  
microorganisms of aphids (Hemiptera: Sternorrhyncha: Aphidoidea): Ultrastructure,  
30 distribution and transovarial transmission. *Eur. J. Entomol.* 111: 91–104.
- Moran, N.A., Russell, J.A., Koga, R., and Fukatsu, T. (2005) Evolutionary relationships of three  
32 new species of Enterobacteriaceae living as symbionts of aphids and other insects. *Appl.*  
*Environ. Microbiol.* 71: 3302–3310.
- 34 Munson, M.A., Baumann, P., Clark, M.A., Baumann, L., Moran, N.A., Voegtlin, D.J., and  
Campbell, B.C. (1991) Evidence for the establishment of aphid-eubacterium endosymbiosis in  
36 an ancestor of four aphid families. *J. Bacteriol.* 173: 6321–6324.
- Nawrocki, E.P. (2009) Structural RNA Homology Search and Alignment Using Covariance Models.

- 1 Oliver, K.M., Degan, P.H., Burke, G.R., and Moran, N.A. (2010) Facultative symbionts in aphids  
2 and the horizontal transfer of ecologically important traits. *Annu. Rev. Entomol.* 55: 247–266.
- 3 Oliver, K.M., Smith, A.H., and Russell, J.A. (2014) Defensive symbiosis in the real world -  
4 advancing ecological studies of heritable, protective bacteria in aphids and beyond. *Funct.*  
*Ecol.* 28: 341–355.
- 5 Pérez-Brocal, V., Gil, R., Ramos, S., Lamelas, A., Postigo, M., Michelena, J.M., *et al.* (2006) A  
6 small microbial genome: The end of a long symbiotic relationship?. *Science.* 314: 312–313.
- 7 Pyka-Fościak, G. and Szklarzewicz, T. (2008) Germ cell cluster formation and ovariole structure in  
8 viviparous and oviparous generations of the aphid *Stomaphis quercus*. *Int. J. Dev. Biol.* 52:  
9 259–265.
- 10 Quast, C., Pruesse, E., Yilmaz, P., Gerken, J., Schweer, T., Yarza, P., *et al.* (2013). The SILVA  
11 ribosomal RNA gene database project: improved data processing and web-based tools. *Nucleic*  
12 *Acids Res.*, 41: D590–D596.
- 13 Ronquist, F., Teslenko, M., van der Mark, P., Ayres, D.L., Darling, A., Höhna, S., *et al.* (2012)  
14 MrBayes 3.2: Efficient Bayesian Phylogenetic Inference and Model Choice Across a Large  
15 Model Space. *Syst. Biol.* 61: 539–542.
- 16 Russell, J.A., Latorre, A., Sabater-Munoz, B., Moya, A., and Moran, N.A. (2003) Side-stepping  
17 secondary symbionts: widespread horizontal transfer across and beyond the Aphidoidea. *Mol.*  
18 *Ecol.* 12: 1061–1075.
- 19 Sakurai, M., Koga, R., Tsuchida, T., Meng, X.-Y., and Fukatsu, T. (2005) *Rickettsia* symbiont in the  
20 pea aphid *Acyrtosiphon pisum*: Novel cellular tropism, effect on host fitness, and interaction  
21 with the essential symbiont *Buchnera*. *Appl. Environ. Microbiol.* 71: 4069–4075.
- 22 Sandström, J.P., Russell, J.A., White, J.P., and Moran, N.A. (2001) Independent origins and  
23 horizontal transfer of bacterial symbionts of aphids. *Mol. Ecol.* 10: 217–228.
- 24 Schloss, P.D., Westcott, S.L., Ryabin, T., Hall, J.R., Hartmann, M., Hollister, E.B., *et al.* (2009)  
25 Introducing mothur: Open-Source, Platform-Independent, Community-Supported Software for  
26 Describing and Comparing Microbial Communities. *Appl. Environ. Microbiol.* 75: 7537–7541.
- 27 Tamas, I., Klasson, L., Canbäck, B., Näslund, K.A., Eriksson, A.-S., Wernegreen, J.J., *et al.* (2002)  
28 50 million years of genomic stasis in endosymbiotic bacteria. *Science.* 296: 2376–2379.
- 29 Tsuchida, T., Koga, R., Fujiwara, A., and Fukatsu, T. (2014) Phenotypic effect of “*Candidatus*  
30 *Rickettsiella viridis*”, a facultative symbiont of the pea aphid (*Acyrtosiphon pisum*), and Its  
31 interaction with a coexisting symbiont. *Appl. Environ. Microbiol.* 80: 525–533.
- 32 Tsuchida, T., Koga, R., Horikawa, M., Tsunoda, T., Maoka, T., Matsumoto, S., *et al.* (2010)  
33 Symbiotic bacterium modifies aphid body color. *Science.* 330: 1102–1104.
- 34



- 2 Tsuchida, T., Koga, R., Meng, X.Y., Matsumoto, T., and Fukatsu, T. (2005) Characterization of a  
facultative endosymbiotic bacterium of the pea aphid *Acyrtosiphon pisum*. *Microb. Ecol.* 49:  
126–133.
- 4 Zhang, Z., Schwartz, S., Wagner, L., and Miller, W. (2000). A Greedy Algorithm for Aligning DNA  
Sequences. *J. Comput. Biol.*, 7: 203–214.

## 6 **Supporting Information**

8 **S1 Table. Accession numbers, collection data, and taxonomic status of sampled aphids and  
their endosymbionts.**

**S2 Table. Primers and probes used to detect endosymbionts from the different aphid species.**  
10 Primers and probes used in this study to detect endosymbionts and their specificities.

**S3 Table. Accession numbers of sequences used for phylogenetic reconstruction.**

12 **S1 Fig. Location and morphology of secondary symbionts in selected Lachninae aphids.** FISH  
microscopic images of aphid embryos from selected Lachninae aphids. Symbiont-specific probes  
14 were used for FISH, except for panels **A-D** and **M-S** in which either one of the symbionts was  
visualised by a general bacterial probe and the other. Colors are as in corresponding images of the  
16 same aphid species in the main text. **(A)** Lateral and **(B-C)** Dorsal views of a *C. (Cu.) tujafilina*  
bacteriome of an early and later embryos, respectively. **(D)** Lateral view of a *C. (Cu.) cupressi*  
18 bacteriome of an early embryo. **(E)** Lateral and **(F-G)** Dorsal views of a *C. (Ci.) cedri* bacteriome of  
an earlier and later embryos, respectively. **(H)** Lateral and **(I)** ventral view of a *Tu. salignus*  
20 bacteriome of an earlier and a late embryo. **(J)** Lateral-ventral view of a *Pt. persicae* bacteriome.  
**(K)** Lateral and **(L)** Ventral view of a *Tr. caudata* bacteriome of an early and later embryo. **(M)**  
22 Ventral view of an *Eu. mediterraneus* bacteriome. **(N)** Lateral and **(O)** ventral view of an *Eu. rileyi*  
bacteriome of an early and later embryo. **(P)** Lateral and **(Q-R)** ventral-lateral views of an *Es.*  
24 *californica* bacteriome from an early and later embryos. **(S)** View of an early embryo of a *C. (Sc.)*  
*obscurus* bacteriome. **(T)** Dorso-lateral and **(U)** lateral views of early embryos of a *Ma. submacula*  
26 bacteriome. Thick white boxes indicate the magnified region, depicted in the top-right of each

panel. The scientific name for each species along with the false colour code for each fluorescent probe and its target group are shown at the top-left of each panel. Scale bars from the unmagnified and magnified FISH images represent 20 and 5 $\mu$ m, respectively.

**S2 Fig. 16S V3-V4 rRNA amplicon sequences taxonomic assignment.** Stacked bar plot showing the relative abundance of contigs assigned to taxonomical units. On the right, pie chart showing the **MegaBLAST** assignment of V3-V4 contigs to reference 16S rRNA genes from aphid endosymbionts. "<1%" indicates the percentage relative to all the reads (N).

**S3 Fig. 16S rRNA gene-based phylogenetic relationships of GLSS strains from the Aphididae.** Bayesian phylogram depicting the relationships and placement of the currently available GLSS strains from Aphididae and selected Enterobacteriaceae, Pasteurellaceae, and Orbaceae. The superscript H at the end of the full species name indicates the symbiont's host name was used. The accession numbers for each sequence used is indicated within parenthesis after the strain name.

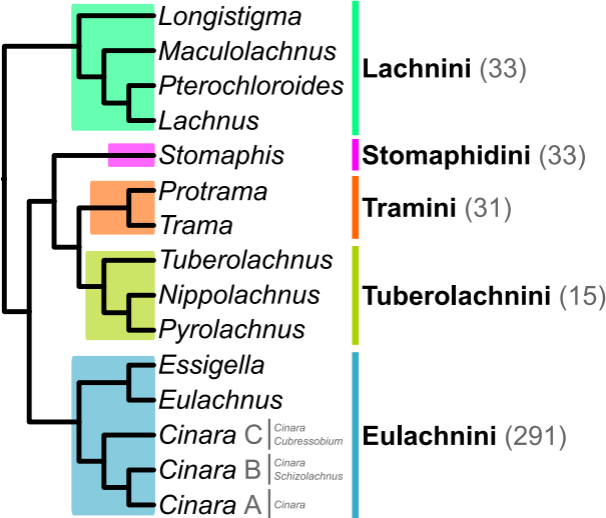

**Fig 1**

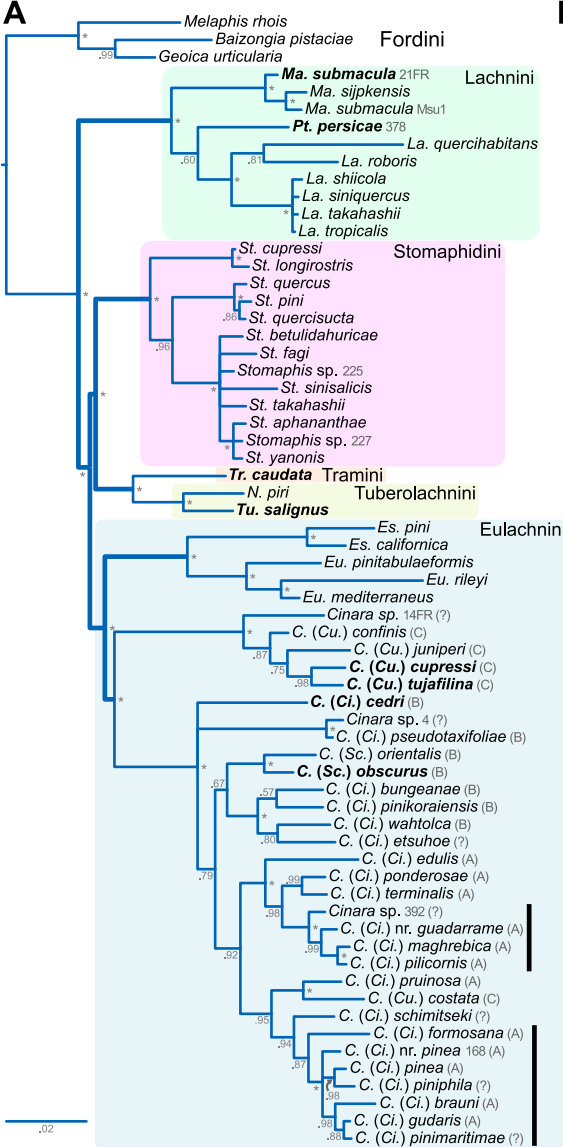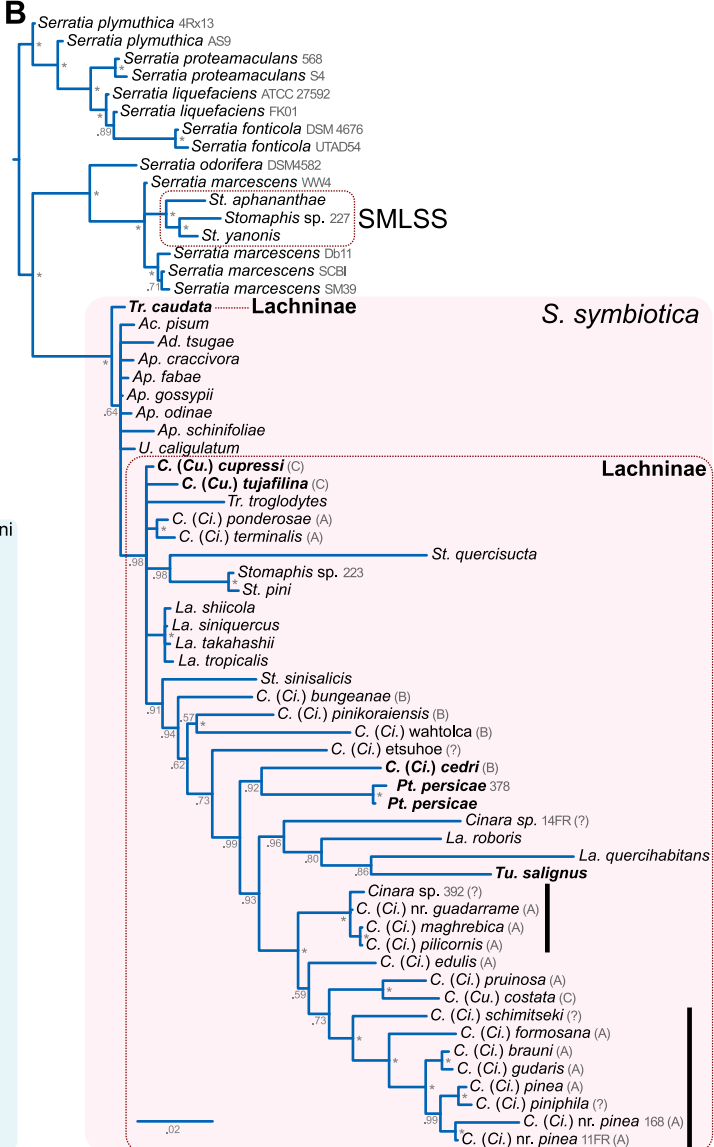

**Fig 2**

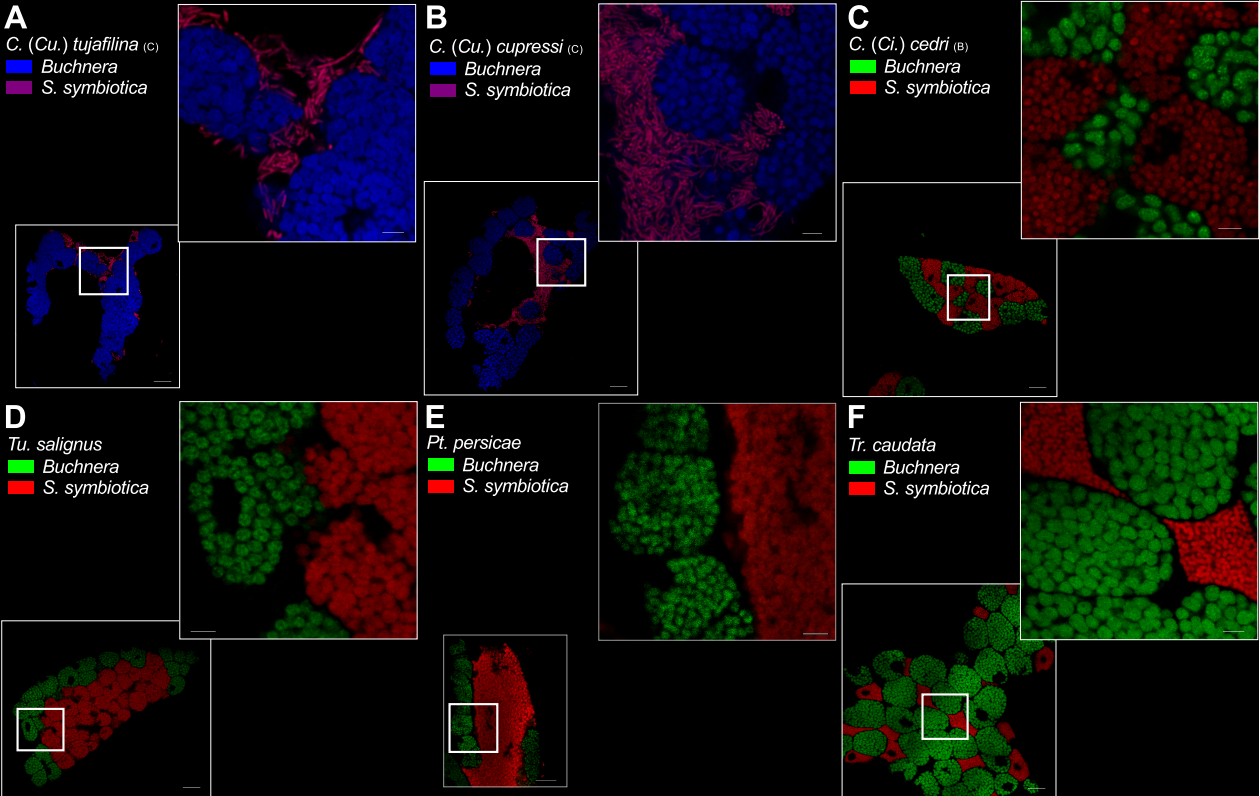

**Fig 3**

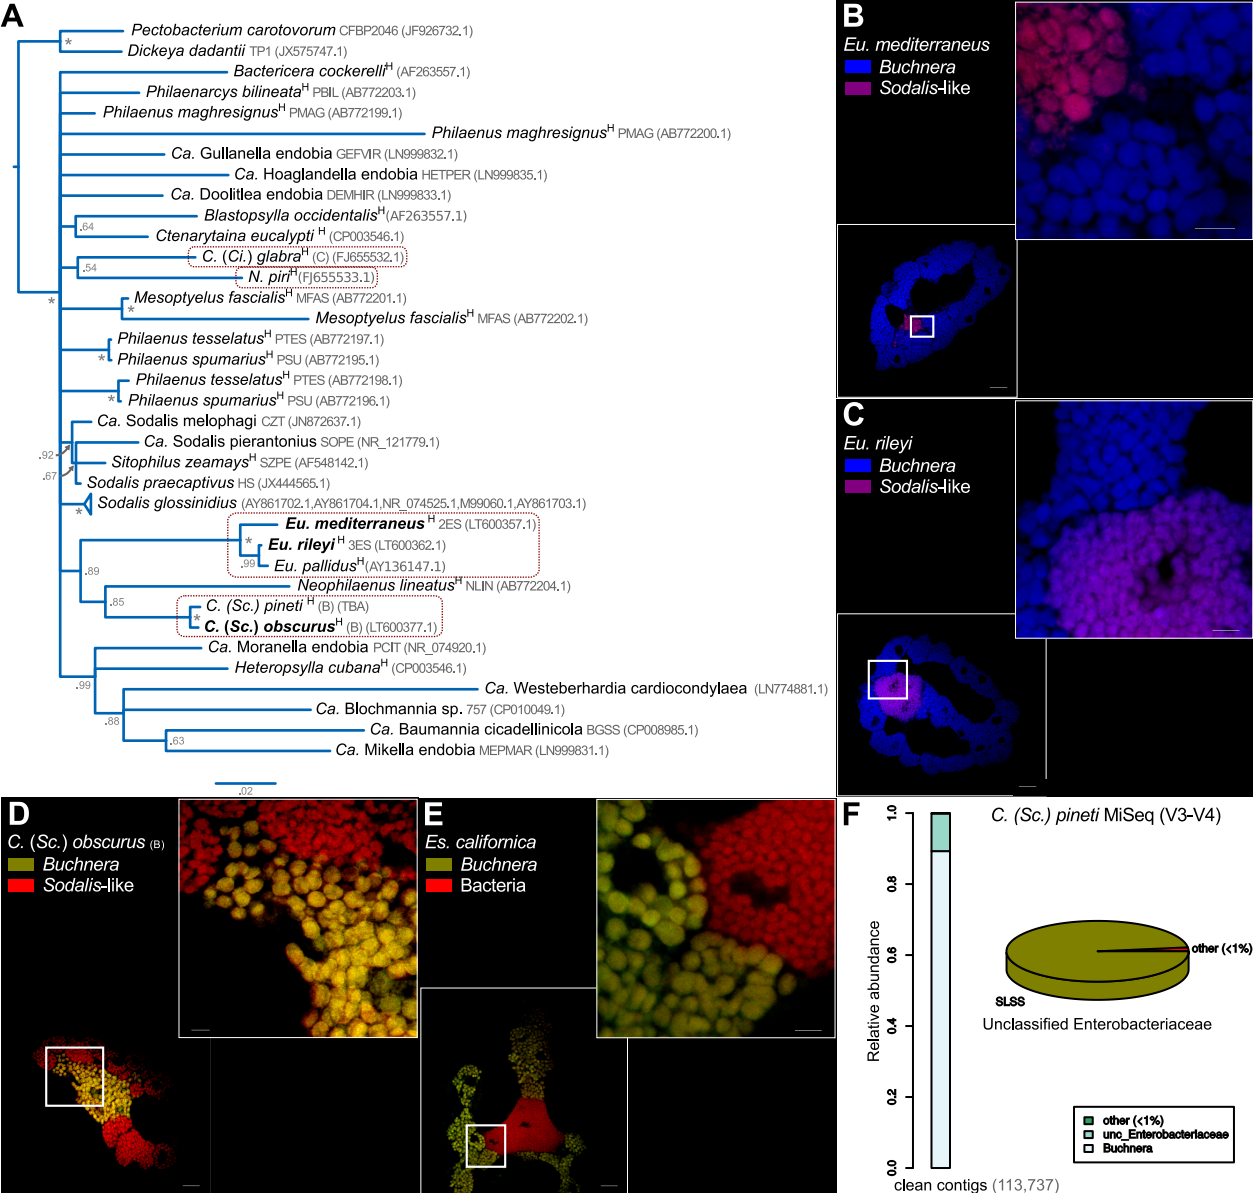

**Fig 4**

**A**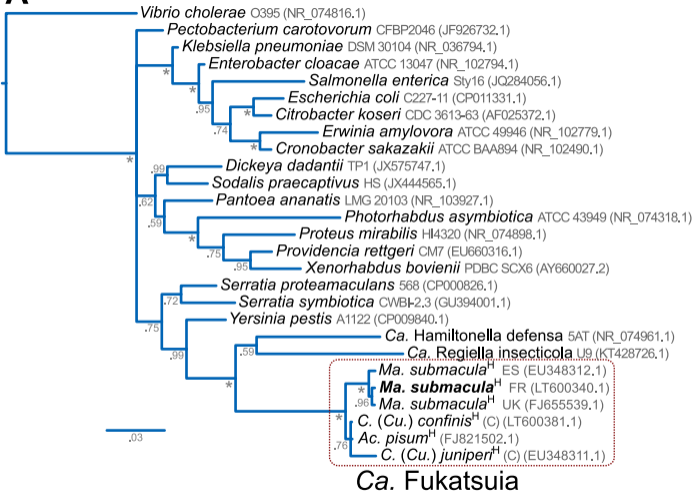**B**

*Ma. submacula*  
■ *Buchnera*  
■ *Ca. Fukatsua*

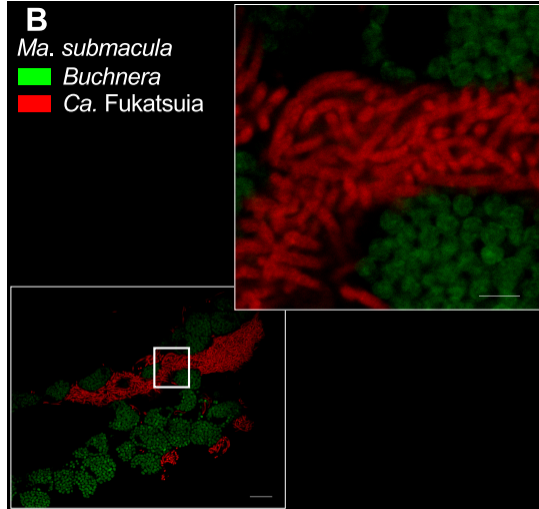**Fig 5**

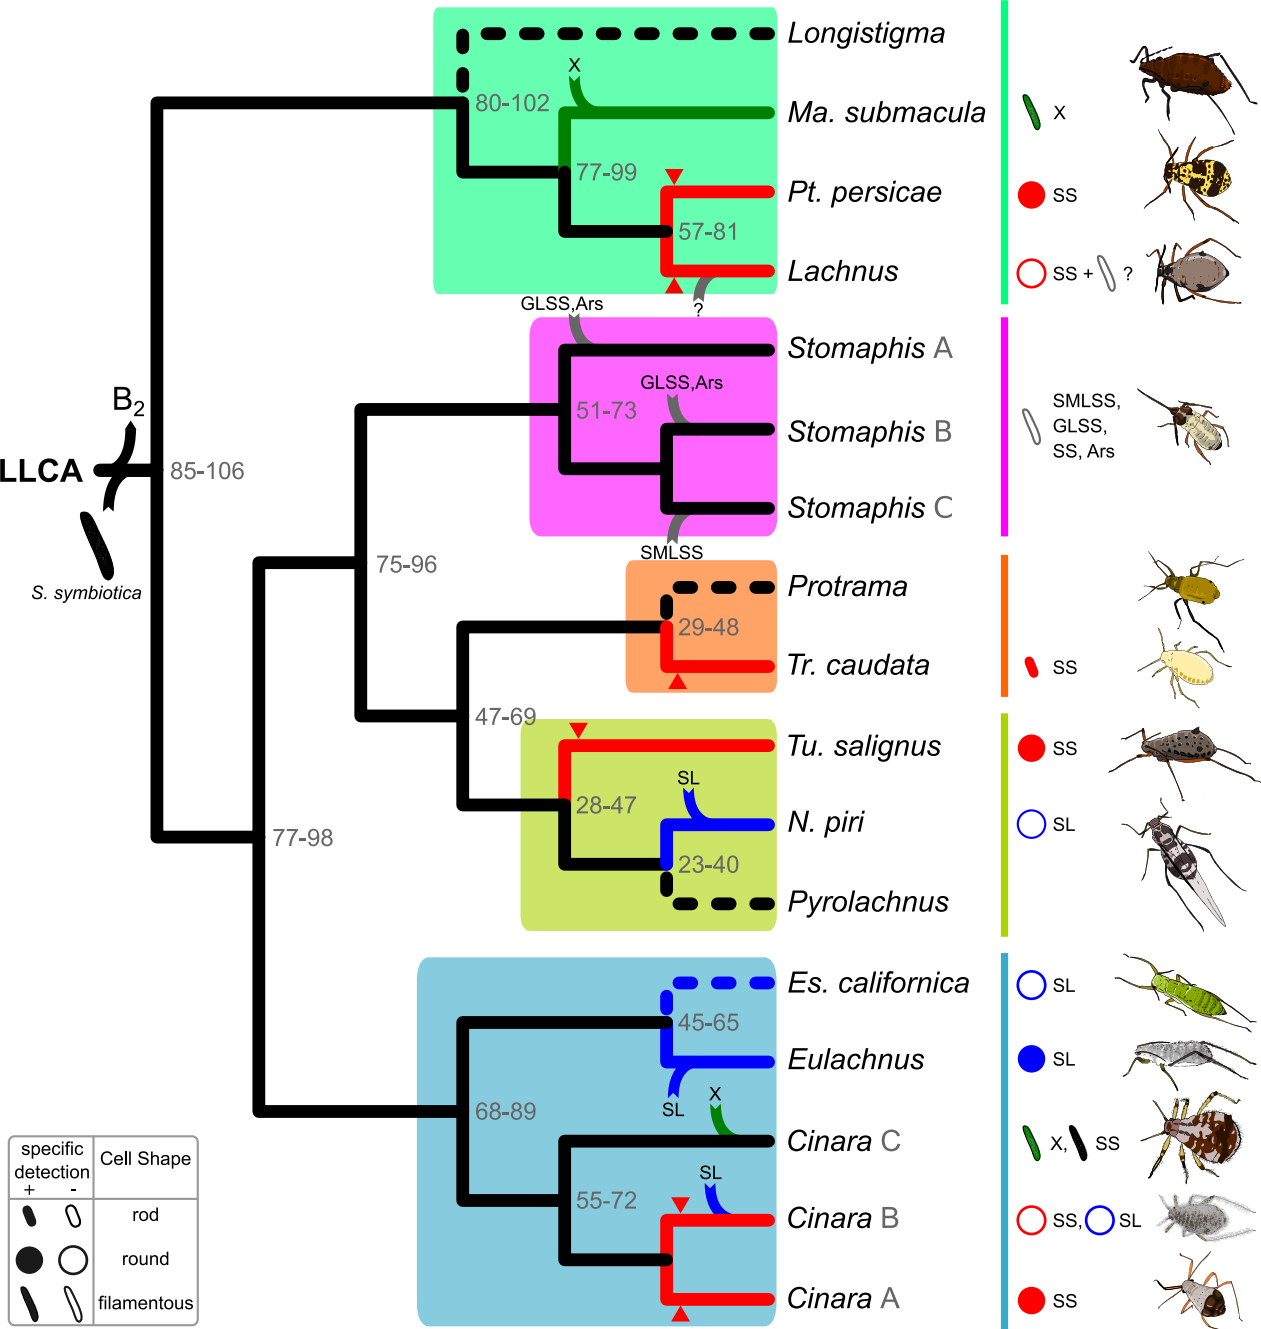

**Fig 6**
